# Supplementary material for: Correlating the Structure and Gene Silencing Activity of Oligonucleotide-Loaded Lipid Nanoparticles Using Small-Angle X-ray Scattering
Source: PubMed Central journal article supplement (PMC10311593; doi:10.1021/acsnano.3c01186), 2023-06-06
Supplement: nn3c01186_si_001.pdf [file nn3c01186_si_001.pdf]

## Supporting Information

### Correlating the Structure and Gene Silencing Activity of Oligonucleotide-Loaded Lipid Nanoparticles Using Small-Angle X-Ray Scattering

Michal Hammel<sup>\*†a</sup>, Yuchen Fan<sup>†b</sup>, Apoorva Sarode<sup>†b</sup>, Amy E. Byrnes<sup>c</sup>, Nanzhi Zang<sup>b</sup>,  
Ponien Kou<sup>b</sup>, Karthik Nagapudi<sup>b</sup>, Dennis Leung<sup>b</sup>, Casper C. Hoogenraad<sup>c</sup>, Tao Chen<sup>b</sup>,  
Chun-Wan Yen<sup>\*b</sup>, Greg L. Hura<sup>\*a,d</sup>

<sup>a</sup> Molecular Biophysics and Integrated Bioimaging Division, Lawrence Berkeley National Lab, Berkeley, CA, 94072 USA

<sup>b</sup> Small Molecule Pharmaceutical Sciences, Genentech Inc., South San Francisco, CA, 94080 USA

<sup>c</sup> Department of Neuroscience, Genentech, Inc., South San Francisco, CA, 94080 USA

<sup>d</sup> Chemistry and Biochemistry Department, University of California Santa Cruz, Santa Cruz, CA, 95064 USA

† These authors contributed equally to this work

\* Corresponding authors, Email: [mhammel@lbl.gov](mailto:mhammel@lbl.gov), [yenc3@gene.com](mailto:yenc3@gene.com), [glhura@lbl.gov](mailto:glhura@lbl.gov)

**Table S1.** Composition, formulation process and particle size characterization of LNPs shown in **Figure 1**.

| LNP lipid composition                                   | N/P ratio | Total lipid concentration (mM) | Formulation process | Mean diameter (nm) | Mean %PD |
|---------------------------------------------------------|-----------|--------------------------------|---------------------|--------------------|----------|
| MC3:DSPC:cholesterol:DMG-PEG <sub>2k</sub> = 40:10:38:2 | 2         | 4                              | Unpurified          | 169.8              | 16.3     |
|                                                         |           | 2                              | Unpurified          | 132.9              | 15.5     |
|                                                         |           | 1                              | Unpurified          | 97.3               | 15.1     |
|                                                         |           |                                | Purified            | 97.2               | 14.1     |
| MC3:DSPC:cholesterol:DMG-PEG <sub>2k</sub> = 40:10:38:5 | 2         | 1                              | Unpurified          | 91.6               | 18.7     |
|                                                         |           |                                | Purified            | 90.3               | 22.8     |
| MC3:DSPC:cholesterol:DMG-PEG <sub>2k</sub> = 40:10:38:2 | 5         | 1                              | Unpurified          | 91.9               | 19.2     |
|                                                         |           |                                | Purified            | 91.9               | 17.8     |

**Table S2.** DLS-based particle size distribution and Oligreen-based ASO encapsulation efficiency of HTS LNPs prepared with 1 mM total lipids, N/P = 2, different PEG-lipid species, and different PEG-lipid molar ratios. (DLS data reprised from our previous publication <sup>17</sup>)

| PEG-lipid molar ratio→               | 1%                         | 3%    | 5%    | 1%               | 3%   | 5%   | 1%                         | 3%   | 5%   |
|--------------------------------------|----------------------------|-------|-------|------------------|------|------|----------------------------|------|------|
| PEG-lipid type                       | Hydrodynamic diameter (nm) |       |       | % Polydispersity |      |      | % Encapsulation efficiency |      |      |
| DMPE (C14:0)-PEG <sub>0.55k</sub>    | 189.5                      | 142.6 | 119.1 | 10.3             | 13.5 | 21.4 | 83.1                       | 78.5 | 75.9 |
| DMPE (C14:0)-PEG <sub>1k</sub>       | 151.3                      | 110.7 | 101.3 | 8.0              | 15.3 | 28.9 | 84.5                       | 74.0 | 70.2 |
| DMPE (C14:0)-PEG <sub>2k</sub>       | 101.7                      | 89.8  | 73.5  | 13.6             | 24.7 | 32.1 | 80.7                       | 68.7 | 54.2 |
| DPPE (C16:0)-PEG <sub>1k</sub>       | 173.8                      | 116.5 | 96.0  | 9.3              | 16.1 | 21.7 | 84.8                       | 80.4 | 74.0 |
| DPPE (C16:0)-PEG <sub>2k</sub>       | 103.2                      | 85.0  | 59.0  | 13.1             | 28.5 | 42.5 | 81.2                       | 65.4 | 52.0 |
| DSPE (C18:0)-PEG <sub>0.55k</sub>    | 211.9                      | 156.4 | 118.7 | 11.3             | 10.1 | 13.3 | 84.1                       | 82.5 | 81.3 |
| DSPE (C18:0)-PEG <sub>1k</sub>       | 156.7                      | 103.2 | 87.2  | 11.8             | 15.8 | 26.9 | 83.9                       | 82.6 | 72.2 |
| DSPE (C18:0)-PEG <sub>2k</sub>       | 98.4                       | 63.9  | 77.4  | 13.8             | 23.0 | 57.1 | 83.7                       | 70.3 | 62.2 |
| DSPE (C18:0)-2 arm-PEG <sub>2k</sub> | 107.2                      | 70.5  | 52.1  | 12.9             | 28.7 | 49.6 | 84.8                       | 70.9 | 52.9 |
| DOPE (C18:1)-PEG <sub>0.55k</sub>    | 212.1                      | 153.6 | 120.9 | 7.1              | 14.1 | 15.0 | 82.8                       | 80.9 | 78.6 |
| DOPE (C18:1)-PEG <sub>1k</sub>       | 132.2                      | 100.5 | 92.9  | 13.3             | 17.8 | 26.3 | 84.1                       | 78.0 | 69.7 |
| DOPE (C18:1)-PEG <sub>2k</sub>       | 104.6                      | 82.2  | 66.5  | 13.9             | 23.9 | 32.1 | 83.5                       | 73.2 | 59.6 |
| DMG (C14:0)-PEG <sub>2k</sub>        | 116.9                      | 109.6 | 111.7 | 11.4             | 19.0 | 21.3 | 80.4                       | 73.6 | 59.7 |
| DSG (C18:0)-PEG <sub>2k</sub>        | 114.7                      | 97.3  | 86.6  | 11.7             | 19.4 | 42.8 | 80.5                       | 69.9 | 56.9 |
| Ceramide (C8)-PEG <sub>0.75k</sub>   | 147.7                      | 118.6 | 118.9 | 13.8             | 12.0 | 13.9 | 80.1                       | 78.5 | 74.8 |
| Ceramide (C8)-PEG <sub>2k</sub>      | 114.7                      | 116.5 | 111.9 | 12.7             | 16.5 | 15.2 | 81.5                       | 67.8 | 63.4 |
| Ceramide (C16)-PEG <sub>0.75k</sub>  | 195.8                      | 163.2 | 130.4 | 10.1             | 11.5 | 23.6 | 86.2                       | 84.3 | 83.1 |
| Ceramide (C16)-PEG <sub>2k</sub>     | 115.6                      | 96.5  | 96.6  | 14.3             | 21.2 | 22.3 | 85.0                       | 74.6 | 53.1 |

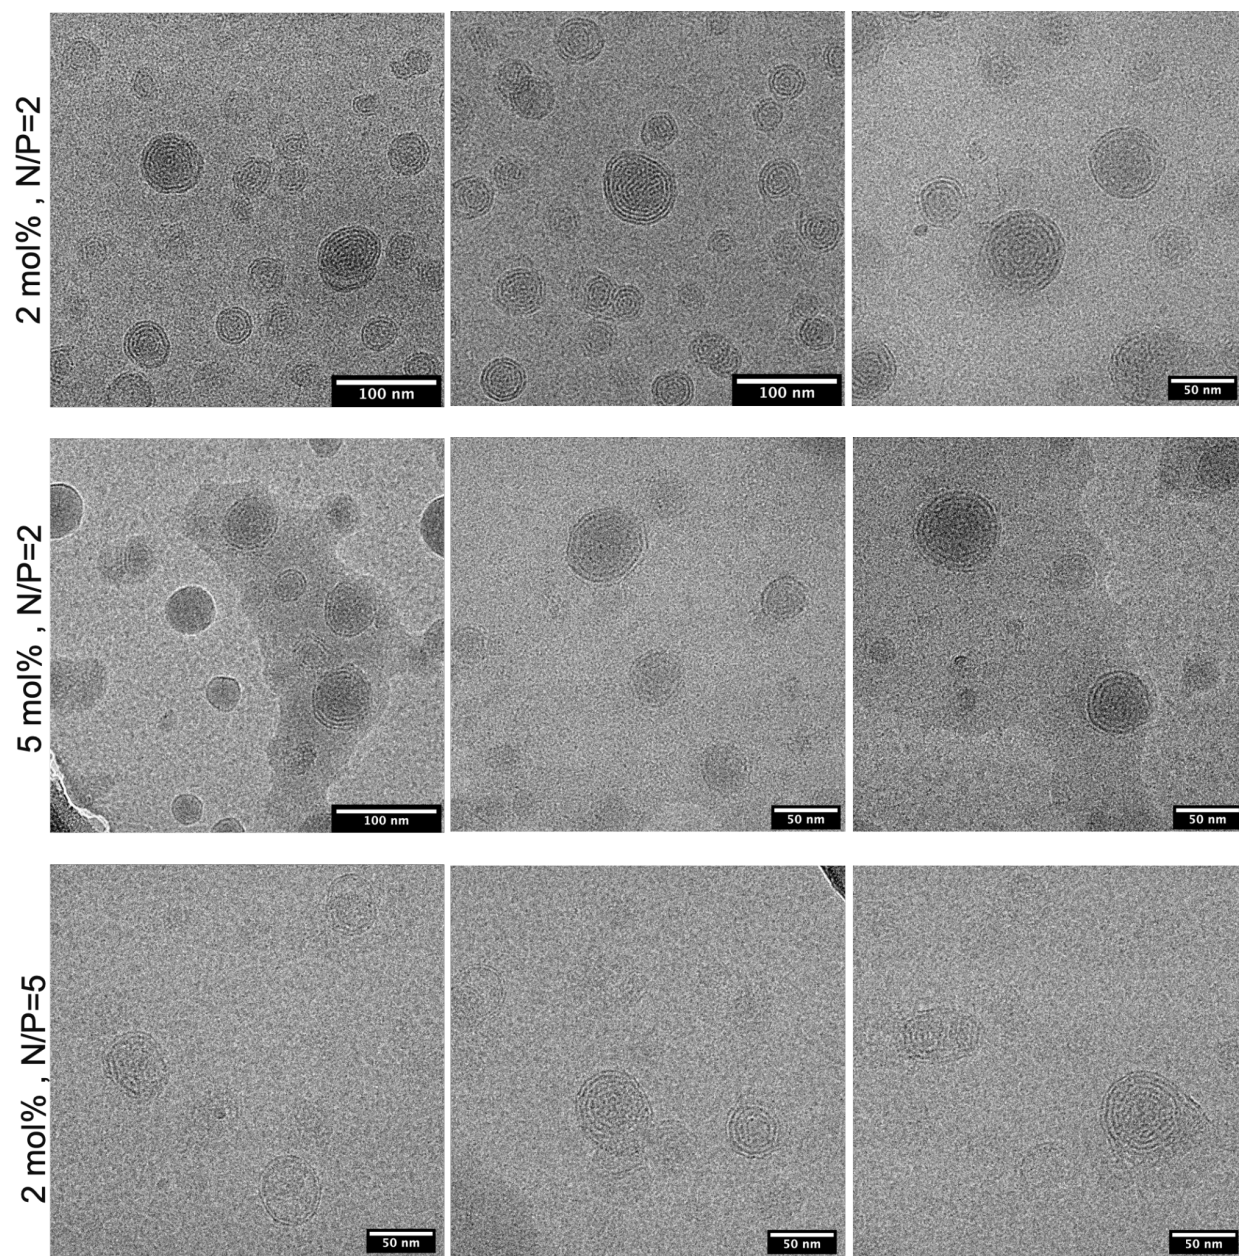

**Figure S1.** More cryo-EM imaging fields associated with **Figure 1D** support the presence of lamellar and hexagonal phases within pre-purified ASO-LNPs. Molar ratios of the DMG-C14 PEG<sub>2k</sub> and N/P ratios are indicated.

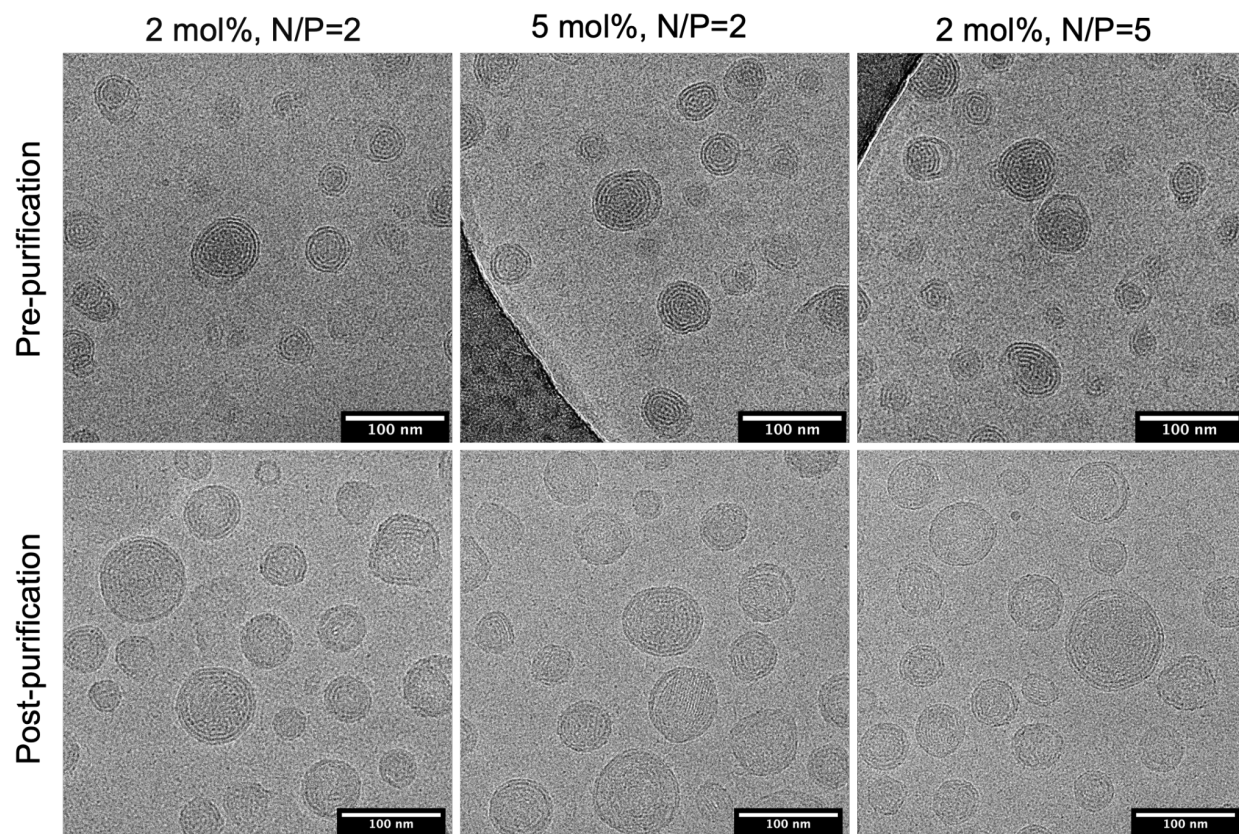

**Figure S2.** Corresponding cryo-EM images were collected for LNP formulations in pre- and post-purified conditions, as shown in **Figure 1B**. Molar ratios of the DMG-C14 PEG<sub>2k</sub> and N/P ratios are indicated.

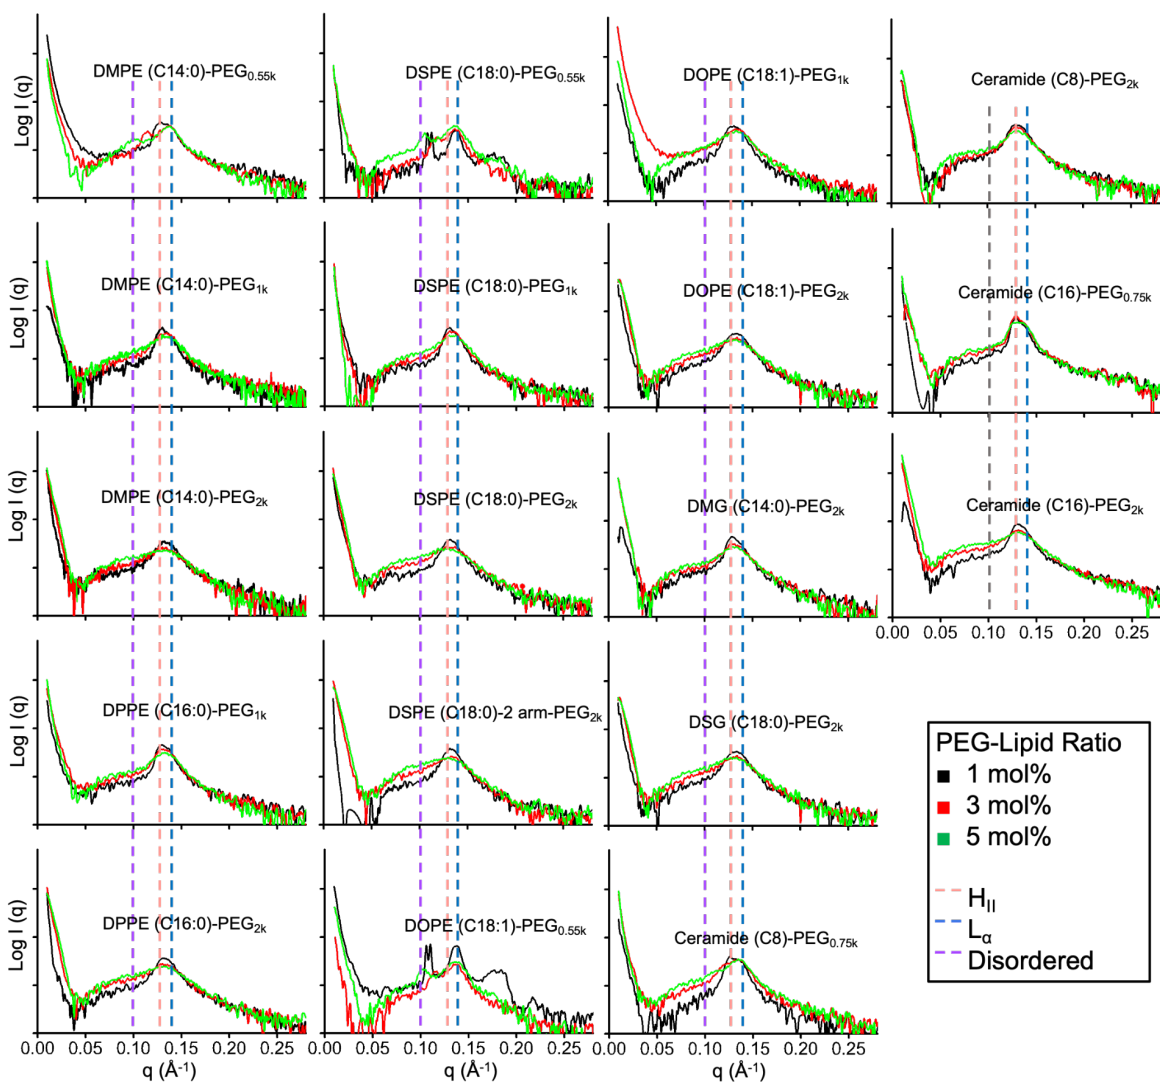

**Figure S3.** SAXS data across the library of 54 LNP formulations with different PEG-lipids. The positions of the SAXS signature of the disordered,  $H_{II}$ , and  $L_{\alpha}$  phases, with the approximate  $d$  spacing of  $\sim 63$  Å,  $\sim 50$  Å, and  $\sim 45$  Å, are highlighted with violet, red, and blue dashed lines, respectively.

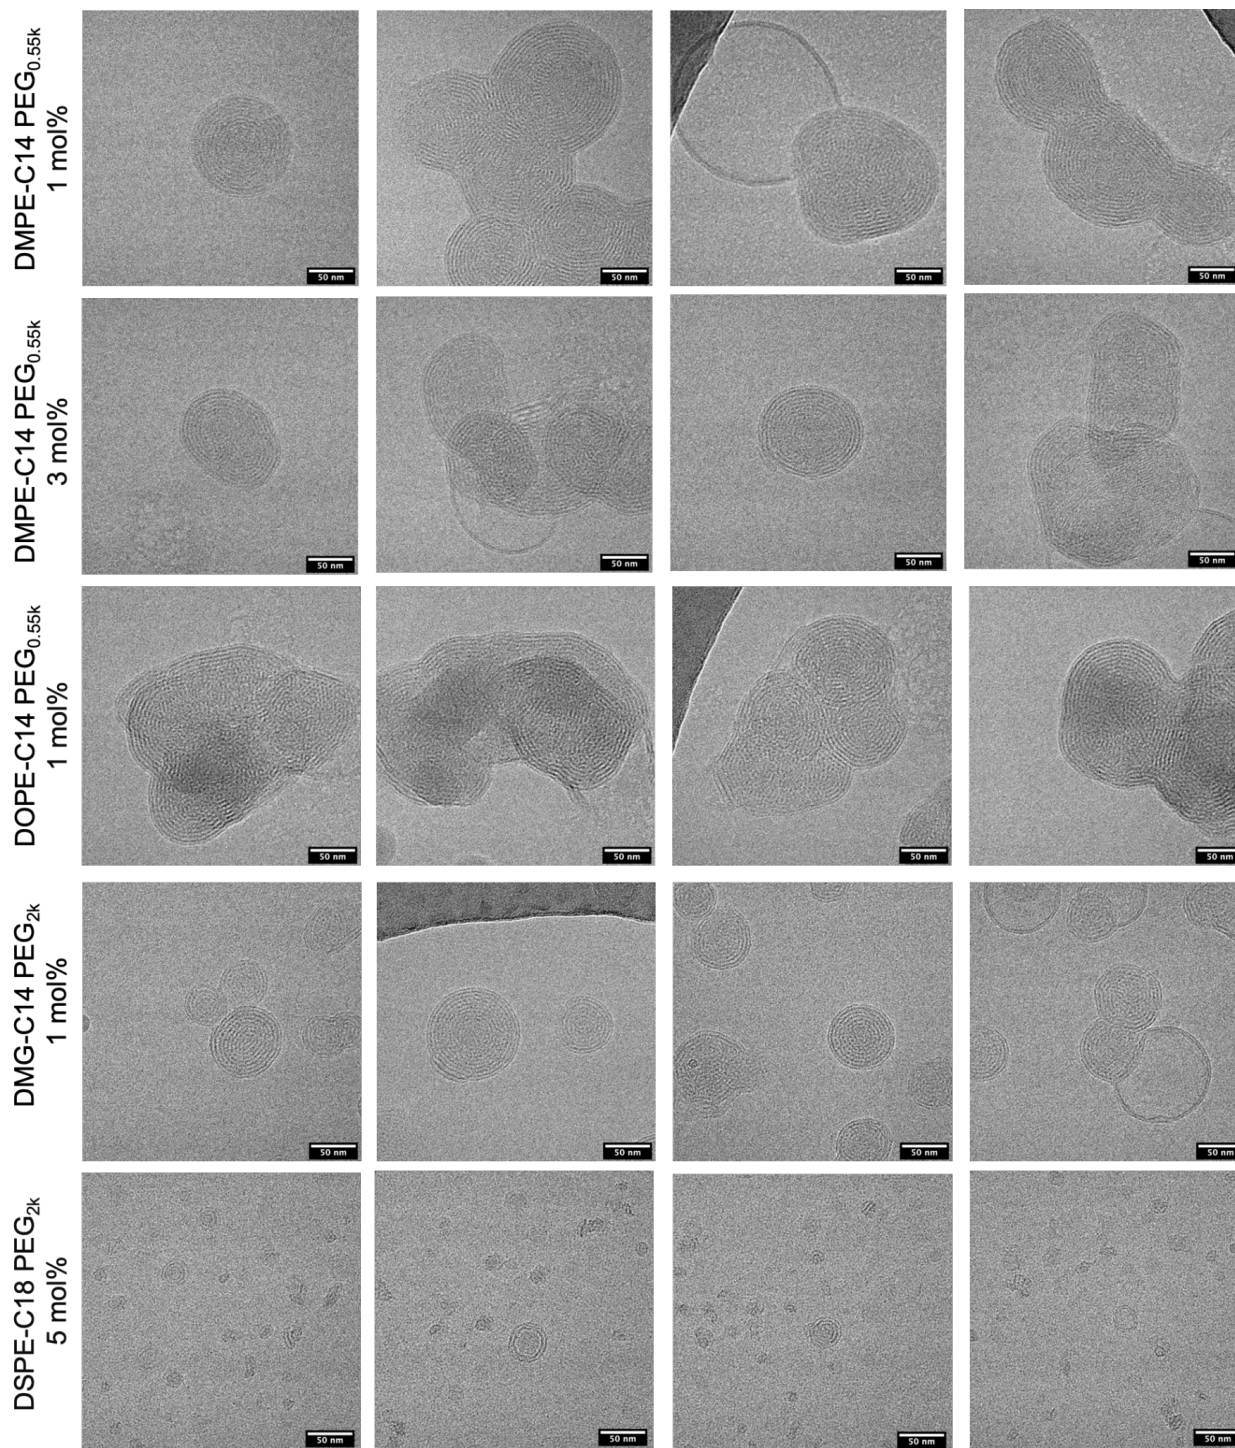

**Figure S4.** Larger field cryo-EM images associated with **Figure 2B** show variations in the size and morphology of ASO-LNPs with various PEG-lipid compositions.

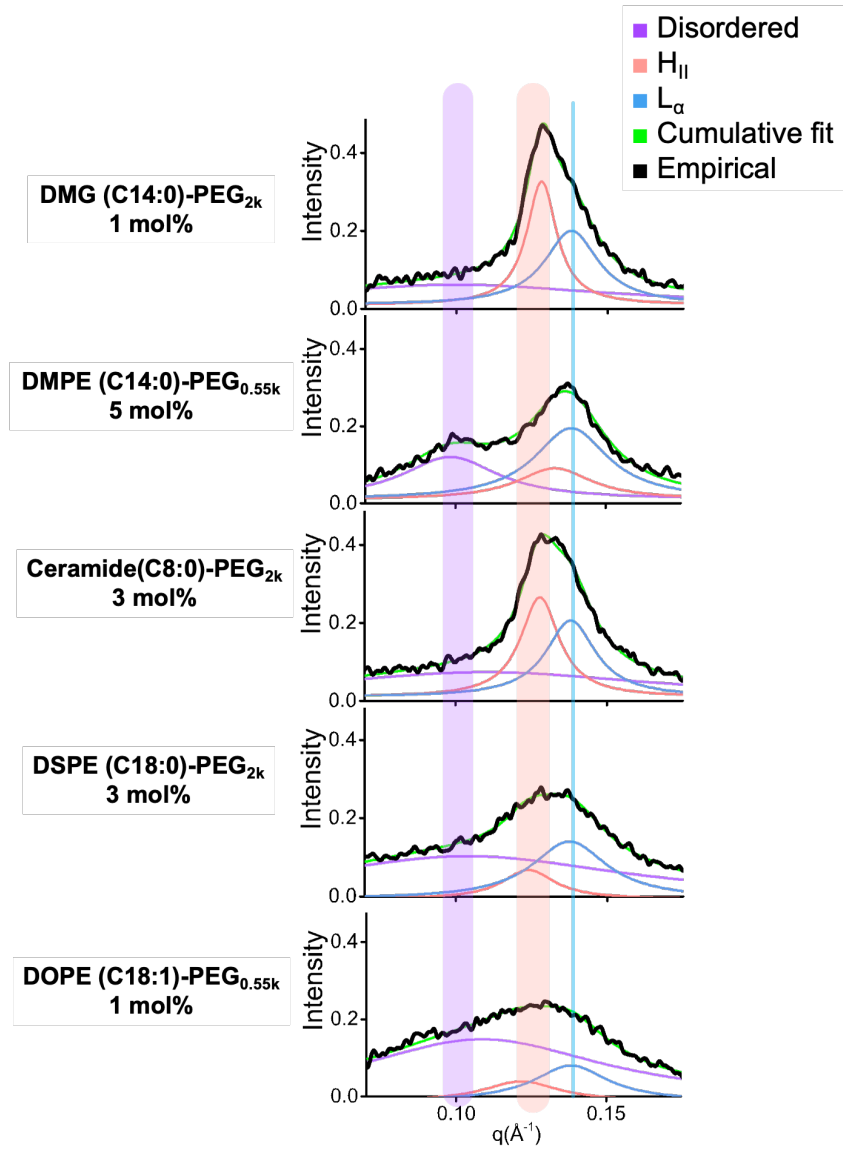

**Figure S5.** Deconvolution of SAXS peaks of representative LNP formulations. Deconvolution of primary SAXS peaks with three Lorentz functions associated with the disordered,  $H_{II}$ , and  $L_{\alpha}$  phases. The center of the Lorentz function and its lower and upper bounds used in the fitting approach are highlighted.

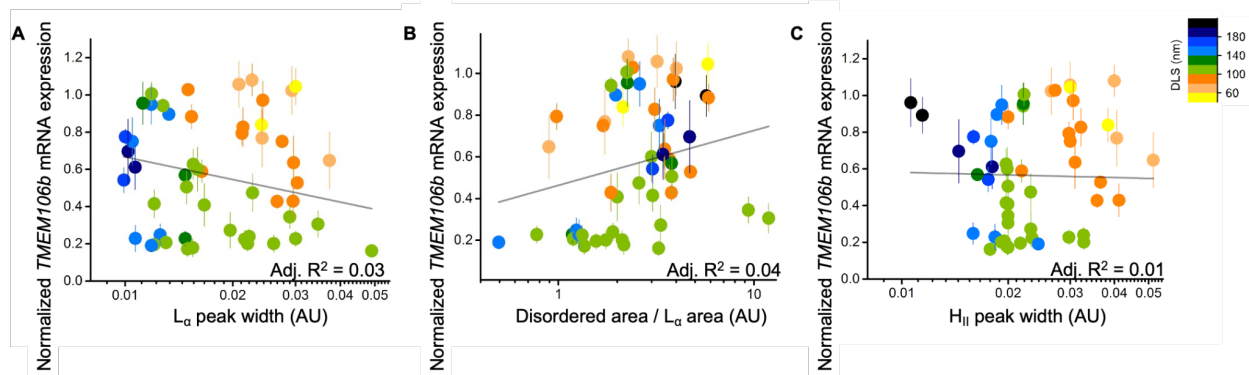

**Figure S6.** Correlations between additional SAXS peak measures, including the Lorentz function width of the  $L_{\alpha}$  signal (**A**), the ratios of Lorentz function areas representing disordered and  $L_{\alpha}$  phases (**B**), and the Lorentz function width of the  $H_{II}$  signal (**C**), with gene knockdown efficacy across the library of 54 LNP formulations.
